1           **Microbiome assembly predictably shapes diversity across a range of disturbance**  
2                                           **frequencies**

3

4                                 **Authors:** Ezequiel Santillan<sup>1</sup> and Stefan Wuertz<sup>1,2\*</sup>

5

6

7     **Affiliations:**

8         <sup>1</sup>Singapore Centre for Environmental Life Sciences Engineering, Nanyang Technological University  
9         Singapore, 637551, Singapore.

10       <sup>2</sup>School of Civil and Environmental Engineering, Nanyang Technological University Singapore,  
11       639798, Singapore.

12

13

14

15     \*Correspondence to: Stefan Wuertz, [swuertz@ntu.edu.sg](mailto:swuertz@ntu.edu.sg)

16 **Abstract**

17 Diversity is frequently linked to the functional stability of ecological communities. However, its  
18 association with assembly mechanisms remains largely unknown, particularly under fluctuating  
19 disturbances. Here, we subjected complex bacterial communities in bioreactor microcosms to  
20 different frequencies of organic loading shocks, tracking temporal dynamics in their assembly,  
21 structure and function. Null modelling revealed a stronger role of stochasticity at intermediate  
22 disturbance frequencies, preceding the formation of a peak in  $\alpha$ -diversity. Communities at extreme  
23 ends of the disturbance range had the lowest  $\alpha$ -diversity and highest within-treatment similarity in  
24 terms of  $\beta$ -diversity, with stronger deterministic assembly. Stochasticity prevailed during the initial  
25 successional stages, coinciding with better specialized function (nitrogen removal). In contrast,  
26 general functions (carbon removal and microbial aggregate settleability) benefited from stronger  
27 deterministic processes. We showed that changes in assembly processes predictably precede changes  
28 in diversity under a gradient of disturbance frequencies, advancing our understanding of the  
29 mechanisms behind disturbance-diversity-function relationships.

30

31 **Key words:** intermediate stochasticity hypothesis, ISH, intermediate disturbance hypothesis, IDH,  
32 succession, diversity, disturbance, community structure, community function, stochastic assembly,  
33 deterministic assembly.

## 34 **Introduction**

35           Microbes exist typically as diverse, complex and dynamic communities<sup>1</sup>, responsible for all  
36 biogeochemical cycles worldwide<sup>2</sup>. These microbial communities or microbiomes provide crucial  
37 functions for global climate regulation, human health, biotechnology and bioremediation<sup>3</sup>. Microbial  
38 diversity is often related to community function<sup>4</sup> and the ability to withstand environmental  
39 fluctuations that typically occur as disturbances<sup>5</sup>. Given the growing human population and its impact  
40 on natural and engineered ecosystems<sup>6</sup>, management and conservation practices are faced with  
41 increasing frequencies and magnitudes of various disturbances that occur on different scales. A  
42 concept of ecology that can be used to explore possible outcomes is the intermediate disturbance  
43 hypothesis (IDH), which predicts a diversity peak at intermediate levels of disturbance due to  
44 competition-colonization trade-offs faced by organisms<sup>7</sup>. Although the IDH has been influential in  
45 ecology<sup>8</sup> and ecosystem conservation<sup>9,10</sup>, it is not a coexistence mechanism as initially thought<sup>11</sup>.  
46 Further, many studies have not found the diversity pattern predicted by the IDH<sup>12,13</sup> and its relevance  
47 as a prediction tool is up for debate<sup>14,15</sup>. Therefore, studies are needed to address the mechanisms  
48 behind the observed disturbance-diversity relationships<sup>16</sup>.

49           Intermediate frequencies of exposure to a xenobiotic pollutant in our recent replicated sludge  
50 bioreactor study demonstrated higher  $\alpha$ -diversity and relative influence of stochastic assembly  
51 compared to other exposure levels, after a short succession period of 35 days<sup>17</sup>. We hypothesized that  
52 when intermediate disturbance levels result in unpredictable environments where specialized traits are  
53 less advantageous to taxa, the stochastic equalization of competitive advantages would lead to a  
54 higher  $\alpha$ -diversity, a causal relationship we named the intermediate stochasticity hypothesis (ISH)<sup>17</sup>.  
55 In contrast, either no disturbance or press disturbance conditions at the extreme ends of a disturbance  
56 range would allow fewer adapted organisms to dominate, thus lowering the  $\alpha$ -diversity. Unlike the  
57 IDH, the ISH incorporates the role of assembly mechanisms as shapers of community structure ( $\alpha$ -  
58 and  $\beta$ - diversity) across a disturbance gradient. Further, it predicts patterns not only in species  
59 richness but also in higher-order  $\alpha$ -diversity indices, since variations in the underlying assembly  
60 mechanisms would affect abundance distributions of taxa. The ISH also considers that the output of a

61 stochastic process is affected by some uncertainty, which means that there are several possible paths  
62 for the evolution of the structure and function of a community. In this regard, stochasticity operating  
63 at intermediate levels of disturbance in replicated systems could lead to similar high  $\alpha$ -diversity  
64 (local, *e.g.*, within a reactor), but not necessarily to similar  $\beta$ -diversity (compositional variation across  
65 sites, *e.g.*, between reactors) and community function<sup>17</sup>. The idea of community assembly processes  
66 underlying the observed patterns of diversity is reasonable, as such processes are believed to shape  
67 community structure<sup>18</sup>, which also links them to ecosystem function. These processes, either  
68 deterministic or stochastic, are known to act in combination to form community assembly<sup>19-22</sup> and can  
69 cause replicate communities to reach a similar or variable structure and function<sup>17,23</sup>. Further, while  
70 recent studies have reported positive correlations of strength of stochasticity with  $\alpha$ -diversity in  
71 bacterial<sup>24</sup> and fungal<sup>25</sup> communities, the role of assembly processes behind diversity patterns under  
72 fluctuating disturbances is still unclear.

73         The objective of this work was to test the central tenet of the ISH that intermediate  
74 disturbance frequencies promote stochastic assembly processes, resulting in increased  $\alpha$ -diversity and  
75 variable  $\beta$ -diversity<sup>17</sup>. We used an experimental system comprised of activated sludge sequencing  
76 batch reactors harboring complex microbial communities collected from a full-scale wastewater  
77 treatment plant. These were subjected to different frequencies of organic loading shocks, tracking  
78 temporal dynamics in their overall assembly, structure and function, without focusing on any  
79 particular taxa. The reactors had a working volume of 25 mL, representing a microcosm scale<sup>26</sup>.  
80 Replicates ( $n = 5$ ) received double organic loading either never (L0, undisturbed), every 8, 6, 4 or 2  
81 days (L1-4, intermediately-disturbed), or every day (L5, press-disturbed), for 42 days. Samples were  
82 analyzed using 16S rRNA gene metabarcoding and effluent chemical characterization. Patterns of  $\alpha$ -  
83 and  $\beta$ -diversity were employed to assess temporal dynamics of bacterial community structure.  
84 Assembly mechanisms were quantified via null model analysis of phylogenetic turnover for each  
85 bioreactor.

## 86 **Results**

### 87 *Intermediate disturbance frequencies exhibit higher taxonomic and phylogenetic $\alpha$ -diversity*

88 Taxonomic  $\alpha$ -diversity was evaluated using Hill diversity indices<sup>27</sup> of orders zero ( ${}^0D$ , taxa  
89 richness), one ( ${}^1D$ ) and two ( ${}^2D$ ), the latter being a robust estimate of microbial diversity<sup>17</sup>.  
90 Phylogenetic  $\alpha$ -diversity was also considered through Faith's phylogenetic distance<sup>28</sup> unweighted  
91 (PD) and abundance-weighted (PD<sub>w</sub>). There was a temporal decrease in  $\alpha$ -diversity for all  
92 disturbance frequency levels compared to the sludge inoculum for both taxonomic and phylogenetic  
93  $\alpha$ -diversity indices (Fig. 1A, Fig. S1). This drop was more pronounced, particularly within the first 14  
94 days, when variability across same-level replicates was also highest. From d14 onwards, disturbance  
95 frequency had a significant effect on  $\alpha$ -diversity ( ${}^2D$ , Welch's ANOVA  $P_{\text{adj}} = <0.001-0.015$ ) (Fig.  
96 1A). A peak in  $\alpha$ -diversity at intermediate frequencies of disturbance was observed for all unweighted  
97 ( ${}^0D$ , PD) and abundance-weighted ( ${}^1D$ ,  ${}^2D$ , PD<sub>w</sub>) indices evaluated in this study (Fig. 1A, Fig. S2, Fig.  
98 S3). Such parabolic pattern was significant from d21 onwards for  ${}^2D$  (Welch's ANOVA  $P_{\text{adj}} \leq 0.003$ ),  
99 from d28 onwards for  ${}^1D$  (Welch's ANOVA  $P_{\text{adj}} = 0.002-0.01$ ), PD (Welch's ANOVA  $P_{\text{adj}} = 0.003-$   
100  $0.037$ ) and PD<sub>w</sub> (Welch's ANOVA  $P_{\text{adj}} = 0.005-0.013$ ), and from d35 onwards for  ${}^0D$  (Welch's  
101 ANOVA  $P_{\text{adj}} = 0.03-0.035$ ).

### 102 *Community assembly temporal dynamics precede $\alpha$ -diversity patterns across disturbance frequencies*

103 Assembly processes were first evaluated by modelling the phylogenetic dispersion of a given  
104 community against the null expectation, through the nearest taxon index (NTI)<sup>29</sup>. We observed higher  
105 stochasticity at the initial stages of the experiment (d0-14), which decreased in relative intensity over  
106 time across disturbance levels for both unweighted (NTI) and abundance-weighted (NTI<sub>w</sub>) indices  
107 (Fig. 1A, Fig. S2). There was a stronger role of stochastic assembly processes at intermediate  
108 disturbance frequencies as shown by NTI values closer to zero (*i.e.*, lower |NTI| values); this was  
109 significant from d14 onward (NTI Welch's ANOVA  $P_{\text{adj}} = <0.001-0.037$ ) but was reduced towards  
110 the end of the study becoming non-significant on d42. Games-Howell post-hoc grouping indicated  
111 that the parabolic pattern of NTI across disturbance frequency levels preceded (d14-35) the formation

112 of a peak in  $\alpha$ -diversity (d21-42) at intermediate levels of disturbance, with two to three groups  
113 significantly differentiated (Fig. 1A). Stochastic assembly processes were less prevalent when  
114 abundance weighing was included in the calculation of the NTI index ( $NTI_w$ ), meaning that  
115 phylogenetic dispersion compared to the null expectation was higher among individual organisms  
116 than it was among taxa. Nonetheless, there was a significant peak in  $NTI_w$  values at intermediate  
117 frequencies of disturbance on d7 and d14 ( $NTI_w$  Welch's ANOVA  $P_{adj} = 0.001$ ). This parabolic  
118 pattern of  $NTI_w$  was evident on d7, preceding that of NTI, but disappeared on d21 and reverted from  
119 d28 onwards. Also, significant phylogenetic signals were observed via mantel correlogram analysis  
120 (Fig. S5) mostly across relatively short phylogenetic distances, justifying the use of phylogenetic null  
121 modelling to evaluate community assembly processes in this study.

122 Stochastic assembly was more important when  $\alpha$ -diversity was higher, particularly for  
123 phylogenetic diversity. This was shown by significant Kendall correlation  $\tau$  values (0.24-0.46,  $P_{adj} <$   
124 0.001) between NTI and  $\alpha$ -diversity indices (Figs. 1B-C, Fig. S4). Kendall correlation  $\tau$  values were  
125 also positive (0.20-0.26) and significant ( $P_{adj} < 0.001$ ) between  $NTI_w$  and phylogenetic  $\alpha$ -diversity  
126 indices (PD,  $PD_w$ ) and unweighted taxonomic  $\alpha$ -diversity ( ${}^0D$ ), but not between  $NTI_w$  and  
127 abundance-weighted taxonomic  $\alpha$ -diversity ( ${}^1D$ ,  ${}^2D$ ) (Fig. S4). The estimation of all the  
128 aforementioned indices over time using rarefied ASV sequencing data yielded the same significant  
129 patterns via Welch's ANOVA, with the exception of  $NTI_w$  on d21 and d42 (see supplementary file).

130  *$\beta$ -diversity patterns display similarity at low and high disturbance frequencies and higher variability*  
131 *at intermediate ones*

132 Community structure in terms of  $\beta$ -diversity showed temporal changes, which varied across  
133 disturbance levels for both Unifrac phylogenetic distances (Fig. 2A) and Bray-Curtis taxonomic  
134 distances (Fig. 2B). Unconstrained ordination displayed a dispersion effect in overall community  
135 structure over time, particularly after 7 days, with communities in each reactor diverting from each  
136 other (Fig. 2A). To disentangle the effect of disturbance from temporal dynamics, constrained  
137 ordination via canonical analysis of principal coordinates (CAP) was used at each time point (Fig.

138 2B). Group-average cluster similarity (60%) was included to detect formations of clusters of  
139 community structure. Differences in  $\beta$ -diversity across disturbance levels were statistically significant  
140 at all time points evaluated (PERMANOVA  $P_{\text{adj}} < 0.001$ ), without significant effects of  
141 heteroscedasticity (PERMDISP  $P_{\text{adj}} > 0.14$ ) (Table S1). Replicate reactors at the undisturbed (L0) and  
142 press-disturbed level (L5) clustered separately from intermediate disturbance levels on all sampling  
143 days (except on d7 and d21 for L0) (Fig. 2B), both levels having 0% misclassification error at all time  
144 points assessed (Fig. 2C). Comparatively, reactors at intermediate disturbance frequencies (L1-4)  
145 clustered together and showed higher dispersion across replicates within the same level, with CAP  
146 misclassification errors above zero (Fig. 2B-C). Thus, replicate reactors were less similar to each  
147 other at intermediate levels of disturbance, while replicates at low (undisturbed) and high (press-  
148 disturbed) disturbance frequencies were more similar. Likewise, community assembly assessed via  
149 the beta nearest taxon index ( $\beta\text{NTI}$ )<sup>30</sup> showed a higher relative contribution of stochasticity at  
150 intermediate levels of disturbance (Fig. 2D), with  $\beta\text{NTI}$  values closer to zero, indicating that  
151 phylogenetic turnover across within-treatment replicates was closer to the null expectation. Similarly  
152 to what we observed through the NTI, the relative importance of stochasticity decreased with time in  
153 the experiment (*i.e.*, higher  $|\beta\text{NTI}|$  values) and when abundance weighing was included in the  
154 calculation of the  $\beta\text{NTI}$  values ( $\beta\text{NTI}_w$ ) (Fig. S6). The observed temporal changes in bacterial  
155 community structure across disturbance frequencies were consistent with phylum-level dynamics in  
156 relative abundances (Fig. S7), although the focus of this study was on overall community dynamics  
157 and not on any particular group of taxa.

### 158 *Community function dynamics and correlations with community structure and assembly*

159 Bacterial community function was assessed over time via influent chemical oxygen demand  
160 (COD) removal, sludge volume index (SVI), and influent total Kjeldahl nitrogen (TKN) removal, as  
161 measure of carbon removal, sludge settleability and nitrogen removal, respectively (Fig. 3A). Carbon  
162 removal and sludge settleability, which are functions associated with a broad range of taxa (*i.e.*,  
163 general functions), improved over time during the experiment. High carbon removal ( $> 0.97$ ) was  
164 achieved at all disturbance frequency levels from d21 onwards, with no significant differences on

165 days 35 and 42, after a period of high variability for same-level replicates during the first 14 days.  
166 Sludge settleability increased with disturbance frequency, with undisturbed (L0) reactors showing the  
167 lowest settleability from d21 onwards and intermediately disturbed levels reaching the highest  
168 settleability on d42 (SVI Welch's ANOVA  $P_{\text{adj}} = 0.018$ ). The nitrogen removal function (TKN  
169 removal), which is related to specialized bacteria (ammonia oxidizers), significantly differed across  
170 disturbance frequencies (TKN removal Welch's ANOVA  $P_{\text{adj}} < 0.001$ ) with the highest removal at  
171 intermediately disturbed levels during the first 21 days. From d28 onwards, L0 to L4 reactors had  
172 similarly high average nitrogen removal ( $> 0.9$ ), and only the press disturbed reactors (L5) continued  
173 to have lower nitrogen removal ( $< 0.7$ ) than that of the initial sludge inoculum (0.8). Effluent values  
174 of TKN, ammonia, nitrite and nitrate showed that TKN removal occurred via nitrification (Fig. S8).

175 Carbon removal had an overall significant negative Kendall correlation with  $\alpha$ -diversity  
176 indices ( $\tau < -0.21$ ,  $P_{\text{adj}} < 0.001$ ), whereas sludge settleability and nitrogen removal showed non-  
177 significant correlations with  $\alpha$ -diversity across the study (Fig. S9). Correlations between general  
178 functions of carbon removal and sludge settleability and both NTI and  $\text{NTI}_W$  were negative and  
179 significant across all time points and disturbance frequencies of the study (Fig. 3B-C, Fig. S9),  
180 indicating improved performance of these functions under stronger deterministic assembly  
181 mechanisms. Nitrogen removal had a non-significant overall correlation with NTI and  $\text{NTI}_W$  (Fig. 3D,  
182 Fig. S9), which became positive and significant when only the first 21 days of the study were  
183 considered (NTI  $\tau_{\text{d}0-21} = 0.39$ ,  $P_{\text{adj}} < 0.001$ , Fig. 3D;  $\text{NTI}_W$   $\tau_{\text{d}0-21} = 0.46$ ,  $P_{\text{adj}} < 0.001$ , Fig. S10),  
184 suggesting better performance of this function under higher stochastic assembly throughout the initial  
185 weeks of the study.

## 186 Discussion

187 In this study we found stochastic assembly processes to be more important at intermediate  
188 disturbance frequencies where the highest  $\alpha$ -diversity was also observed, together with high  $\beta$ -  
189 diversity dispersion across within-treatment replicates as predicted by the ISH<sup>17</sup>. Furthermore, we  
190 showed that a peak in the relative contribution of stochasticity preceded a peak in  $\alpha$ -diversity across a  
191 disturbance frequency range. Also, we observed that higher stochasticity during initial successional



192 stages correlated with better nitrogen removal (specialized function) at intermediate disturbance  
193 frequencies, while carbon removal and microbial aggregate settleability (general functions) improved  
194 in step with more deterministic forces. These findings highlight the utility of the ISH for a  
195 mechanistic understanding of disturbance-diversity-function relationships.

196 We expanded our earlier work<sup>17</sup> by using a different type of disturbance and microbial  
197 community inoculum, a relevant scenario given the multidimensional nature of disturbance<sup>31</sup>.  
198 Employing taxonomic and phylogenetic diversity metrics, in both unweighted and abundance-  
199 weighted forms, allowed us to cover a broader aspect of  $\alpha$ -diversity. Taxonomic resolution was also  
200 improved by the use of amplicon sequence variants (ASVs) compared to operational taxonomic unit  
201 (OTU) clustering<sup>32</sup> with about one to two orders of magnitude fewer spurious units<sup>33</sup>, allowing for a  
202 better estimation of unweighted  $\alpha$ -diversity (*i.e.*, taxa richness). We further verified that the observed  
203 patterns occurred independently of data rarefaction, given the lack of consensus about this practice<sup>34</sup>  
204 and the fact that it is known to affect (mainly unweighted) estimations of  $\alpha$ -diversity<sup>35</sup>. Assembly  
205 processes were tracked over time using a phylogenetic null modelling methodology, which has been  
206 tested and recommended in microbial ecology<sup>20,30,36</sup>. Additionally, general and specific functions were  
207 evaluated against structure and assembly. All the aforementioned enhancements allowed us to test the  
208 ISH, while also gaining new insights into the role of assembly processes behind disturbance-induced  
209 changes in community structure and function over time.

210 Our experimental system produced a succession scenario in which bacterial communities had to  
211 adapt to change from a full-scale system to a bioreactor microcosm setup along a disturbance  
212 frequency gradient, similarly to what we described in a prior study<sup>37</sup>. With regards to community  
213 structure, succession led to a significant hump-backed pattern of  $\alpha$ -diversity for all composition- and  
214 abundance-based indices employed in the study, which occurred after 21 days for <sup>2</sup>D, 28 days for <sup>1</sup>D,  
215 PD and PD<sub>w</sub>, and 35 days for <sup>0</sup>D. Thus, the observed dynamics in community structure were stronger  
216 in terms of relative abundances than richness (<sup>2</sup>D, <sup>1</sup>D vs. <sup>0</sup>D), as well as at the phylogenetic versus  
217 taxonomic level (PD vs. <sup>0</sup>D). The appearance of higher phylogenetic  $\alpha$ -diversity at intermediate levels  
218 of disturbance for both unweighted (PD) and abundance-weighted (PD<sub>w</sub>) indices suggests that

219 considering evolutionary relationships among organisms<sup>38</sup> could also aid in assessing the effect of  
220 varying disturbances on community structure under succession. In our study, disturbance promoted  
221 the co-occurrence of phylogenetically distinct organisms, suggesting that additional niches were  
222 created at intermediate disturbance frequencies that were occupied by ecologically different species,  
223 thus reducing competitive exclusion. Conversely, phylogenetic clustering at undisturbed and press-  
224 disturbed levels can be interpreted as communities structured by environmental filtering<sup>29</sup>.  
225 Additionally, temporal analysis of community structure in terms of  $\beta$ -diversity revealed three different  
226 clusters for undisturbed, press-disturbed and intermediately disturbed reactors. Further comparison of  
227 replicates within the same disturbance frequency level showed higher  $\beta$ -diversity variability at  
228 intermediate disturbance levels, which was coherent with prior observations in freshwater ponds<sup>39</sup> and  
229 sludge bioreactors<sup>17</sup> where  $\beta$ -diversity increased with stochastic assembly. Our findings are relevant  
230 for understanding disturbance-diversity relationships, since few studies have reported parabolic  $\alpha$ -  
231 diversity patterns using abundance-based indices<sup>8</sup>. Furthermore, variations in  $\beta$ -diversity among  
232 ecological communities that are subject to large and fluctuating disturbances are believed to provide  
233 insights about the mechanisms driving changes in  $\alpha$ -diversity and function<sup>40</sup>.

234 We observed similar trends of phylogenetic dispersion within a single community (NTI) and  
235 the phylogenetic turnover between communities of the same treatment level ( $\beta$ NTI), compared to the  
236 null expectation. Stochasticity was more important during initial successional stages of the study, with  
237 initial NTI and  $\beta$ NTI values closer to zero (*i.e.*, closer to the null expectation of the model).  
238 Relatively, the overall strength of deterministic processes increased with time, with higher |NTI| and  
239 | $\beta$ NTI| values. Similarly, late succession stages were shown to be governed by deterministic processes  
240 in plant forest<sup>41</sup> and microbial groundwater communities<sup>42</sup>. Furthermore,  $\alpha$ -diversity-based temporal  
241 assembly dynamics revealed a parabolic pattern in NTI and NTI<sub>w</sub>, through the disturbance frequency  
242 gradient, which was evident after 14 and 7 days of the study, respectively, before the appearance of  
243 similar parabolic patterns across various  $\alpha$ -diversity indices. This preceding pattern is considered here  
244 as a strong indicator of assembly mechanisms operating to shape community structure. It is, therefore,  
245 plausible that stochastic assembly mechanisms were first favored at intermediate disturbance

246 frequencies, prompting subsequent changes of community structure that resulted in the observed  
247 higher  $\alpha$ -diversity as the ISH proposes<sup>17</sup>. These observations are also coherent with the idea that  
248 secondary succession is community assembly in action<sup>43</sup>. The disturbance range in this study  
249 produced different secondary succession scenarios, with communities in the sludge of each bioreactor  
250 likely experiencing different re-colonization processes from their bacterial seed-bank (*i.e.*, low-  
251 abundance or rare taxa), via stochastic processes such as priority effects<sup>44</sup> followed by historical  
252 contingency<sup>45</sup> and legacy effects<sup>3</sup>. Importantly, external dispersal processes<sup>46</sup> (*i.e.*, bacterial  
253 immigration) could not influence community assembly since bioreactors within this study were  
254 operated as closed systems. Indeed, microbial seed-banks are thought to contribute to the maintenance  
255 of microbial diversity<sup>47</sup> and have been described as essential for understanding temporal community  
256 changes<sup>48</sup>. Further, stochastic assembly processes were shown to be more preponderant within the rare  
257 fraction of the microbial community<sup>22</sup>. Nonetheless, other processes might also be promoting  
258 stochastic assembly at intermediate disturbance frequencies, like ecological drift<sup>36</sup> and feedback  
259 mechanisms linked to density dependence and species interactions<sup>49</sup>. Hence, a disturbance frequency  
260 gradient can not only result in nonlinearities for growth rates that would affect the outcome of  
261 competition<sup>14,31</sup>, it could also alter the relative contribution of stochastic and deterministic  
262 mechanisms of community assembly that underlie changes in community structure<sup>17</sup>. Furthermore,  
263 our results showed that, over a range of disturbance frequencies, assessing temporal community  
264 assembly patterns during succession can act as a sentinel of upcoming patterns of diversity.

265 Stochasticity was positively correlated with better nitrogen (as TKN) removal via nitrification  
266 at intermediate disturbance frequencies during the initial successional stages where stochastic  
267 processes were also generally prevalent. Nitrification functions are carried out by specific taxa (*i.e.*,  
268 nitrifiers), which are slow growers, nutritionally inflexible, sensitive to inhibitors and less  
269 phylogenetically diverse than many other key functional guilds<sup>50</sup>. Yet, the recruitment of nitrifying  
270 organisms from the microbial seed-bank was important for the recovery of nitrification, following the  
271 removal of a long-term disturbance of altering food-to-biomass and carbon-to-nitrogen ratios in  
272 sludge bioreactors, although resilience varied across identically treated replicates<sup>51</sup>. Also, partial  
273 recovery of nitrification in sludge bioreactors was observed at intermediate frequencies of 3-

274 chloroaniline disturbance, where stochastic assembly processes and within-treatment variability were  
275 also higher<sup>17</sup>. Conversely, general functions of carbon removal and settleability performed better  
276 when deterministic processes were stronger (higher |NTI| values). Carbon removal was better when  $\alpha$ -  
277 diversity was lower, similarly to what was reported previously using a different xenobiotic  
278 disturbance in bioreactors<sup>17</sup>. Hence, a more diverse community does not necessarily translate into  
279 better ecosystem functions<sup>17,52</sup>. Our data suggest that general functions thrive during stronger  
280 deterministic processes, while specialized functions might be favored by stochasticity at initial  
281 successional stages. Future studies assessing the effect of fluctuating disturbances on community  
282 diversity and function should also consider the type of function (*e.g.*, specific or general), the stage of  
283 succession after the disturbance, and the underlying assembly mechanisms.

284       The observed patterns in community assembly, structure and function were time-dependent.  
285 The ISH successional pattern appears to be transient, as assembly mechanisms across disturbance  
286 frequency levels were not significantly different towards the end of the study on d42, while  $\alpha$ -  
287 diversity continued to display a significant parabolic pattern. If the gradient of disturbance frequencies  
288 is maintained over time, then the peak in  $\alpha$ -diversity at intermediate levels might continue during the  
289 late successional stages, but this remains to be investigated. Nonetheless, most relevant bacteria in  
290 activated sludge have generation times of less than 24 h. Hence, the 42-day length of this study  
291 represented around tens to hundredths of generations of many different taxa, allowing the detection of  
292 significant patterns in assembly and structure. Further research in a variety of ecosystems is needed to  
293 validate the broad applicability of the ISH, particularly considering that disturbance can vary in type,  
294 frequency, intensity, driver and impact<sup>31,53</sup>. Studies at different scales are also necessary since  
295 ecological patterns can vary across spatial, temporal and phylogenetic scales<sup>3</sup>, while the effect of  
296 dispersal processes could also be evaluated within open systems.

297       Although a similar study on communities of larger organisms would require considerably larger  
298 scales of space and time, some modelling approaches suggest that ISH-like patterns (Fig. 4) could  
299 emerge in community assembly and structure under varying disturbances. For example, forest fire  
300 modelling showed that intermediate lightning strike frequency values yielded higher diversity with a

301 close balance between stochastic and deterministic forces, which were highly sensitive to probabilistic  
302 events leading the system to diverse trajectories<sup>54</sup>. Likewise, a conceptual model developed for plants  
303 and animals suggested that high variation in resource abundance and location in space and time,  
304 which could be caused by disturbance, would favor diversity via adaptation through novelty and  
305 innovation (*i.e.*, stochasticity) generation<sup>55</sup>. The predictions of the ISH could help to identify cases  
306 when disturbance-induced stochastic assembly promotes alternative states of community structure that  
307 compromise or enhance ecosystem function, so as to design mitigation or intensification strategies.  
308 Furthermore, it could be used to promote community resistance and resilience to future disturbances  
309 via increased  $\alpha$ -diversity and functional-gene diversity. Alternatively, this theoretical framework  
310 could help develop functionally resilient communities that do not occur naturally, through the  
311 stochastic mechanisms that are initially elicited at intermediate frequencies of disturbance. Therefore,  
312 we propose that the ISH has potential for a general understanding of disturbance-induced changes in  
313 community structure and function during succession, by integrating the influence of the underlying  
314 assembly processes over time.

## 315 **Materials and Methods**

### 316 *Experimental design and function analyses*

317 We employed 30 sequencing batch bioreactors at a microcosm scale (25-mL working volume),  
318 inoculated with activated sludge from a full-scale wastewater treatment plant in Singapore and  
319 operated for 42 days at 30°C in an incubator shaker. The daily complex synthetic feeding regime  
320 (adapted from Santillan *et al.*<sup>51</sup>) included double organic loading at varying disturbance frequencies.  
321 Six levels of disturbance were set in quintuplicate independent reactors ( $n = 5$ ), which received double  
322 organic loading either never (undisturbed), every eight, six, four, or two days (intermediately-  
323 disturbed), or every day (press-disturbed). Level numbers were assigned from 0 to 5 (0 for no  
324 disturbance, 1 to 5 for low to high disturbance frequency). Disturbance frequency was further  
325 calculated from the rate of high organic loading at each disturbance level resulting in values of 0,  $1/8$ ,  
326  $1/6$ ,  $1/4$ ,  $1/2$ , and 1. Ecosystem function, in the form of process performance parameters at the end of a  
327 cycle, was measured weekly in accordance with Standard Methods<sup>56</sup> where appropriate, and targeted

328 the removal of soluble COD and TKN from the mixed liquor after feeding. Sludge settling capacity  
329 was measured via the SVI (mL/g), considering 30 minutes of settling time. Concentrations in the  
330 mixed liquor of the bioreactors after feeding (*i.e.*, beginning of a new cycle) were regularly 305.8  
331 ( $\pm 7.4$ ) mg COD/L and 45.6 ( $\pm 0.8$ ) mg TKN/L, or 594.7 ( $\pm 18.6$ ) mg COD/L and 46.1 ( $\pm 0.2$ ) mg  
332 TKN/L when double organic loading occurred. A food-to-biomass ratio (F:M) control approach was  
333 used as previously described<sup>51</sup>, for which biomass was measured weekly as total suspended solids  
334 (TSS) after which sludge wastage was done to target a TSS of 1,500 mg/L. The latter resulted in  
335 average solids residence time (SRT) values of 30, 26, 23, 22, 19 and 15 days, for disturbance levels  
336 from 0 to 5, respectively. Note that these SRT values are well above the doubling times of relevant  
337 bacteria in activated sludge<sup>57</sup>. Sludge samples of 2 mL ( $m = 184$ ) were collected on the initial day of  
338 the study (four samples, taken at random from the inoculum mix) and weekly from each reactor  
339 afterwards (180 samples), for DNA extraction as previously described<sup>37</sup>.

#### 340 *16S rRNA gene metabarcoding and reads processing*

341 Bacterial 16S rRNA metabarcoding was done in two steps as described in Santillan *et al.*<sup>51</sup>. Primer set  
342 341f/785r targeted the V3-V4 variable regions of the 16S rRNA gene<sup>58</sup>. The libraries were sequenced  
343 in-house at SCELSE on an Illumina MiSeq (v.3) with 20% PhiX spike-in, at 300 bp paired-end read-  
344 length. Sequenced sample libraries were processed with the *dada2* (v.1.3.3) R-package<sup>33</sup>, allowing  
345 inference of ASVs<sup>32</sup>. Illumina adaptors and PCR primers were trimmed prior to quality filtering.  
346 Sequences were truncated after 280 and 255 nucleotides for forward and reverse reads, respectively.  
347 After truncation, reads with expected error rates higher than 3 and 5 for forward and reverse reads,  
348 respectively, were removed. After filtering, error rate learning, ASV inference and denoising, reads  
349 were merged with a minimum overlap of 20 bp. Chimeric sequences (0.17% on average) were  
350 identified and removed. For a total of 184 samples, an average of 18,086 reads were kept per sample  
351 after processing, representing 47% of the average forward input reads. Taxonomy was assigned using  
352 the SILVA database (v.132)<sup>59</sup>. Diversity and assembly analyses were carried on both unrarefied and  
353 rarefied datasets. To generate the rarefied dataset, samples were rarefied to the lowest number of reads  
354 (5,089) in a sample after processing (Fig. S11).

355 *Bacterial community structure analyses and statistics*

356 All reported P-values for statistical tests in this study were corrected for multiple comparisons using a  
357 false discovery rate (FDR) of 5%. Hill diversity indices<sup>27</sup> were used to quantify taxonomic  $\alpha$ -diversity  
358 as described elsewhere<sup>17</sup>. Phylogenetic  $\alpha$ -diversity was assessed through Faith's phylogenetic  
359 distance<sup>28</sup> (PD) including its abundance-weighted version (PD<sub>w</sub>). Community structure in terms of  
360 taxonomic  $\beta$ -diversity was evaluated through: i) canonical analysis of principal coordinates (CAP)  
361 ordination including ellipses of 60% group-average cluster similarity; ii) misclassification error  
362 analysis for each disturbance frequency level over the six time points sampled, via the leave-one-out  
363 allocation of observations to groups from CAP; and iii) multivariate tests of permutational analysis of  
364 variance (PERMANOVA) and permutational analysis of dispersion (PERMDISP); all from Bray-  
365 Curtis dissimilarity matrixes at each time point sampled (30 bioreactors, n = 5), constructed from  
366 square-root transformed abundance data using PRIMER (v.7)<sup>60</sup>. Phylogenetic  $\beta$ -diversity was  
367 assessed via non-metric multidimensional (NMDS) ordination of a weighted Unifrac dissimilarity  
368 matrix, constructed from Hellinger transformed abundance data of all 184 samples using the  
369 *phyloseq*<sup>61</sup> R-package (v.1.30.0) in R. The *ggplot2* package (v.3.3.2) in R<sup>62</sup> was used for local  
370 polynomial regression fitting via the *loess* function (including 95% confidence intervals) and box  
371 plots construction (using Tukey style whiskers). The *ggdist* R-package (v.2.4.1) was used to make the  
372  $\beta$ NTI raincloud plot. Univariate testing through Welch's analysis of variance (ANOVA) with Games-  
373 Howell post-hoc grouping was done using the *rstatix*<sup>63</sup> (v.0.6.0) R-package. Kendall correlations were  
374 done using the *ggpubr*<sup>64</sup> package (v.0.4.0) in R. Heat maps for bacterial phyla relative abundances  
375 were constructed using the *ampvis2*<sup>65</sup> package (v.2.6.2) in R.

376 *Bacterial community assembly analyses and statistics*

377 The effect of underlying assembly mechanisms was assessed using phylogenetic-based null modelling  
378 approaches on both  $\alpha$ - and  $\beta$ -diversity. First, the nearest taxon index (NTI)<sup>29</sup> was calculated for each  
379 community to assess whether  $\alpha$ -diversity was more or less structured than would be expected by  
380 random chance. The model uses the mean nearest taxon distance (MNTD)<sup>29</sup>, which quantifies the  
381 phylogenetic distance between each ASV in one community, as a measure of the clustering of closely

382 related ASVs. Phylogenetic relatedness of ASVs was characterized by multiple-alignment of ASV  
383 sequences using *decipher* (v.2.14.0) R-package<sup>66</sup>. The phylogenetic tree was then constructed and a  
384 GTR+G+I maximum likelihood tree was fitted using the *phangorn* (v.2.5.5) R-package<sup>67</sup>. To quantify  
385 the degree to which MNTD deviates from a null model expectation, ASVs and abundances were  
386 shuffled across the tips of the phylogenetic tree. After shuffling, MNTD was recalculated to obtain a  
387 null value, and repeating the shuffling 1,000 times provided a null distribution. Then, NTI was  
388 calculated as the difference between the mean of the null distribution and the observed MNTD in  
389 units of standard deviation<sup>29</sup>. The closer to zero a NTI value is, the closer to the null expectation (*i.e.*,  
390 higher stochasticity) is the phylogenetic dispersion of a given community. Positive NTI values  
391 suggest phylogenetic clustering while negative values indicate phylogenetic overdispersion. Second,  
392  $\beta$ -diversity null modelling via the  $\beta$ -nearest taxon index ( $\beta$ NTI) was done to investigate if the  
393 phylogenetic turnover across two samples was significantly more or less similar than would be  
394 expected by just random chance<sup>30</sup>. The model uses the  $\beta$ -mean nearest taxon distance ( $\beta$ MNTD),  
395 which quantifies the phylogenetic distance between pairs of ASVs drawn from two distinct  
396 communities. To quantify the degree to which  $\beta$ MNTD deviates from a null model expectation, ASVs  
397 and abundances were shuffled across the tips of the phylogenetic tree. After shuffling,  $\beta$ MNTD was  
398 recalculated to obtain a null value, and repeating the shuffling 1,000 times provided a null  
399 distribution. Then,  $\beta$ NTI was calculated as the difference between the mean of the null distribution  
400 and the observed  $\beta$ MNTD in units of standard deviation<sup>30</sup>. The closer to zero a  $\beta$ NTI value is, the  
401 closer to the null expectation (*i.e.*, higher stochasticity) is the phylogenetic turnover between two  
402 communities. By convention, a value of  $|\beta$ NTI| > 2 indicates that the observed turnover is  
403 significantly deterministic, while  $|\beta$ NTI| < 2 indicates dominance of stochastic assembly processes<sup>20</sup>.  
404 Similarly, here we consider that  $|\text{NTI}| < 2$  indicates dominance of stochastic phylogenetic clustering.  
405 Both unweighted and abundance-weighted NTI and  $\beta$ NTI values were calculated. These analyses  
406 were done using the *metagMisc*<sup>68</sup> (v.0.0.4) and *picante*<sup>69</sup> (v.1.8.2) R-packages. To test for a  
407 phylogenetic signal across phylogenetic distances, Mantel correlograms were constructed using the  
408 *vegan*<sup>70</sup> (v.2.5.6) R-package, relating between-ASV niche differences to between-ASV phylogenetic



409 distances across a given phylogenetic distance, following the previously described methodology<sup>20,30</sup>.  
410 Environmental niches were constructed from bioreactor effluent process data (COD removal, TKN  
411 removal and SVI). Phylogenetic distances were quantified for 50 phylogenetic distance bins, while the  
412 significance of Pearson correlations was assessed using 1,000 permutations and FDR (5%) correction.

#### 413 **Acknowledgements**

414 This research was supported by the Singapore National Research Foundation and Ministry of  
415 Education under the Research Centre of Excellence Program. We thank JYJ Tan, JQ Teo, A Latiff, SS  
416 Thi, AFBM Batcha, CK Aw, ABA Aziz, and JHJ Lim for their assistance with laboratory work. DI  
417 Drautz-Moses provided support for the 16S rRNA gene amplicon library preparation and sequencing  
418 pipelines employed. We thank J Thompson and VR Regina for helpful suggestions that improved the  
419 manuscript.

#### 420 **Author Contributions**

421 Both authors conceived the idea. ES designed and performed the experiment, as well as data  
422 processing and analyses. SW obtained the funding for the study. ES wrote the manuscript draft. Both  
423 authors contributed to manuscript editing.

#### 424 **Data availability**

425 DNA sequencing data are available at NCBI BioProjects with accession number PRJNA723443. See  
426 supplementary information for details about the sludge inoculum collection, synthetic feed  
427 preparation, and additional figures of diversity and community assembly metrics, correlations, heat  
428 maps and data rarefaction. Diversity analyses on rarefied data and all other relevant data to reproduce  
429 the results of this study are available as supplementary files in the online version of this manuscript.

#### 430 **Competing interests**

431 The authors declare no competing interests.

## 432 References

- 433
- 434 1 Widder, S. *et al.* Challenges in microbial ecology: building predictive understanding of  
435 community function and dynamics. *ISME J.* **10**, 2557-2568 (2016).
- 436 2 Flemming, H.-C. & Wuertz, S. Bacteria and archaea on Earth and their abundance in  
437 biofilms. *Nat. Rev. Microbiol.* **17**, 247–260 (2019).
- 438 3 Ladau, J. & Elloe-Fadrosch, E. A. Spatial, Temporal, and Phylogenetic Scales of Microbial  
439 Ecology. *Trends Microbiol.* (2019).
- 440 4 Wagg, C., Bender, S. F., Widmer, F. & van der Heijden, M. G. A. Soil biodiversity and soil  
441 community composition determine ecosystem multifunctionality. *Proceedings of the National  
442 Academy of Sciences* **111**, 5266-5270 (2014).
- 443 5 Shade, A. *et al.* Fundamentals of microbial community resistance and resilience. *Front.  
444 Microbiol.* **3**, 1-19 (2012).
- 445 6 Zalasiewicz, J., Williams, M., Steffen, W. & Crutzen, P. The New World of the  
446 Anthropocene. *Environ. Sci. Technol.* **44**, 2228-2231 (2010).
- 447 7 Connell, J. H. Diversity in tropical rain forests and coral reefs. *Science* **199**, 1302-1310  
448 (1978).
- 449 8 Svensson, J. R., Lindegarth, M., Jonsson, P. R. & Pavia, H. Disturbance–diversity models:  
450 what do they really predict and how are they tested? *Proceedings of the Royal Society B:  
451 Biological Sciences* **279**, 2163-2170 (2012).
- 452 9 Yuan, Z. Y., Jiao, F., Li, Y. H. & Kallenbach, R. L. Anthropogenic disturbances are key to  
453 maintaining the biodiversity of grasslands. *Sci. Rep.* **6**, 22132-22132 (2016).
- 454 10 Sasaki, T. *et al.* Management applicability of the intermediate disturbance hypothesis across  
455 Mongolian rangeland ecosystems. *Ecol. Appl.* **19**, 423-432 (2009).
- 456 11 Roxburgh, S. H., Shea, K. & Wilson, J. B. The intermediate disturbance hypothesis: Patch  
457 dynamics and mechanisms of species coexistence. *Ecology* **85**, 359-371 (2004).
- 458 12 Mackey, R. L. & Currie, D. J. The diversity-disturbance relationship: Is it generally strong  
459 and peaked? *Ecology* **82**, 3479-3492 (2001).
- 460 13 Kershaw, H. M. & Mallik, A. U. Predicting Plant Diversity Response to Disturbance:  
461 Applicability of the Intermediate Disturbance Hypothesis and Mass Ratio Hypothesis. *Crit.  
462 Rev. Plant Sci.* **32**, 383-395 (2013).
- 463 14 Fox, J. W. The intermediate disturbance hypothesis should be abandoned. *Trends Ecol. Evol.*  
464 **28**, 86-92 (2013).
- 465 15 Sheil, D. & Burslem, D. Defining and defending Connell's intermediate disturbance  
466 hypothesis: a response to Fox. *Trends Ecol. Evol.* **28**, 571-572 (2013).
- 467 16 Shea, K., Roxburgh, S. H. & Rauschert, E. S. J. Moving from pattern to process: coexistence  
468 mechanisms under intermediate disturbance regimes. *Ecol. Lett.* **7**, 491-508 (2004).
- 469 17 Santillan, E., Seshan, H., Constancias, F., Drautz-Moses, D. I. & Wuertz, S. Frequency of  
470 disturbance alters diversity, function, and underlying assembly mechanisms of complex  
471 bacterial communities. *NPJ Biofilms Microbiomes* **5**, 1-8 (2019).
- 472 18 Leibold, M. A., Chase, J. M. & Ernest, S. K. M. Community assembly and the functioning of  
473 ecosystems: how metacommunity processes alter ecosystems attributes. *Ecology* **98**, 909-919  
474 (2017).
- 475 19 Chase, J. M. & Myers, J. A. Disentangling the importance of ecological niches from  
476 stochastic processes across scales. *Philosophical Transactions of the Royal Society B-  
477 Biological Sciences* **366**, 2351-2363 (2011).
- 478 20 Dini-Andreote, F., Stegen, J. C., van Elsas, J. D. & Salles, J. F. Disentangling mechanisms  
479 that mediate the balance between stochastic and deterministic processes in microbial  
480 succession. *Proc. Natl. Acad. Sci. USA* **112**, E1326-E1332 (2015).
- 481 21 Santillan, E., Seshan, H. & Wuertz, S. Press xenobiotic 3-chloroaniline disturbance favors  
482 deterministic assembly with a shift in function and structure of bacterial communities in  
483 sludge bioreactors. *ACS ES&T Water* **1**, 1429-1437 (2021).
- 484 22 Santillan, E., Constancias, F. & Wuertz, S. Press disturbance alters community structure and  
485 assembly mechanisms of bacterial taxa and functional genes in mesocosm-scale bioreactors.  
486 *mSystems* **5**, e00471-00420 (2020).

- 487 23 Zhou, J. Z. *et al.* Stochastic assembly leads to alternative communities with distinct functions  
488 in a bioreactor microbial community. *mBio* **4**, 1-8 (2013).
- 489 24 Xun, W. *et al.* Diversity-triggered deterministic bacterial assembly constrains community  
490 functions. *Nat. Commun.* **10**, 3833 (2019).
- 491 25 Gao, C. *et al.* Fungal community assembly in drought-stressed sorghum shows stochasticity,  
492 selection, and universal ecological dynamics. *Nat. Commun.* **11**, 34 (2020).
- 493 26 Drake, J. M. & Kramer, A. M. Mechanistic analogy: how microcosms explain nature. *Theor.*  
494 *Ecol.* **5**, 433-444 (2012).
- 495 27 Hill, M. O. Diversity and evenness: a unifying notation and its consequences. *Ecology* **54**,  
496 427-432 (1973).
- 497 28 Faith, D. P. Conservation evaluation and phylogenetic diversity. *Biol. Conserv.* **61**, 1-10  
498 (1992).
- 499 29 Webb, C. O., Ackerly, D. D., McPeck, M. A. & Donoghue, M. J. Phylogenies and  
500 Community Ecology. *Annu. Rev. Ecol. Syst.* **33**, 475-505 (2002).
- 501 30 Stegen, J. C. *et al.* Quantifying community assembly processes and identifying features that  
502 impose them. *ISME J.* **7**, 2069-2079 (2013).
- 503 31 Miller, A. D., Roxburgh, S. H. & Shea, K. How frequency and intensity shape diversity-  
504 disturbance relationships. *Proc. Natl. Acad. Sci. USA* **108**, 5643-5648 (2011).
- 505 32 Callahan, B. J., McMurdie, P. J. & Holmes, S. P. Exact sequence variants should replace  
506 operational taxonomic units in marker-gene data analysis. *ISME J.* **11**, 2639–2643 (2017).
- 507 33 Callahan, B. J. *et al.* DADA2: High resolution sample inference from Illumina amplicon data.  
508 *Nat. Methods* **13**, 581-583 (2016).
- 509 34 Weiss, S. *et al.* Normalization and microbial differential abundance strategies depend upon  
510 data characteristics. *Microbiome* **5**, 27 (2017).
- 511 35 McMurdie, P. J. & Holmes, S. Waste not, want not: why rarefying microbiome data is  
512 inadmissible. *PLoS Comp. Biol.* **10**, e1003531 (2014).
- 513 36 Zhou, J. & Ning, D. Stochastic community assembly: does it matter in microbial ecology?  
514 *Microbiol. Mol. Biol. Rev.* **81**, 1-32 (2017).
- 515 37 Santillan, E., Seshan, H., Constancias, F. & Wuertz, S. Trait-based life-history strategies  
516 explain succession scenario for complex bacterial communities under varying disturbance.  
517 *Environ. Microbiol.* **21**, 3751-3764 (2019).
- 518 38 Martiny, A. C., Treseder, K. & Pusch, G. Phylogenetic conservatism of functional traits in  
519 microorganisms. *ISME J.* **7**, 830-838 (2013).
- 520 39 Chase, J. M. Stochastic Community Assembly Causes Higher Biodiversity in More  
521 Productive Environments. *Science* **328**, 1388-1391 (2010).
- 522 40 Mori, A. S., Isbell, F. & Seidl, R. Beta-diversity, community assembly, and ecosystem  
523 functioning. *Trends Ecol. Evol.* **33**, 549-564 (2018).
- 524 41 Chai, Y. *et al.* Patterns of taxonomic, phylogenetic diversity during a long-term succession of  
525 forest on the Loess Plateau, China: insights into assembly process. *Sci. Rep.* **6**, 27087 (2016).
- 526 42 Zhou, J. Z. *et al.* Stochasticity, succession, and environmental perturbations in a fluidic  
527 ecosystem. *Proc. Natl. Acad. Sci. USA* **111**, E836-E845 (2014).
- 528 43 Lebrija-Trejos, E., Pérez-García, E. A., Meave, J. A., Bongers, F. & Poorter, L. Functional  
529 traits and environmental filtering drive community assembly in a species-rich tropical system.  
530 *Ecology* **91**, 386-398 (2010).
- 531 44 Nemergut, D. R. *et al.* Patterns and processes of microbial community assembly. *Microbiol.*  
532 *Mol. Biol. Rev.* **77**, 342-356 (2013).
- 533 45 Fukami, T. Historical Contingency in Community Assembly: Integrating Niches, Species  
534 Pools, and Priority Effects. *Annu. Rev. Ecol. Syst.* **46**, 1-23 (2015).
- 535 46 Hanson, C. A., Fuhrman, J. A., Horner-Devine, M. C. & Martiny, J. B. H. Beyond  
536 biogeographic patterns: processes shaping the microbial landscape. *Nat. Rev. Microbiol.* **10**,  
537 497-506 (2012).
- 538 47 Lennon, J. T. & Jones, S. E. Microbial seed banks: the ecological and evolutionary  
539 implications of dormancy. *Nat. Rev. Microbiol.* **9**, 119 (2011).
- 540 48 Shade, A. *et al.* Conditionally rare taxa disproportionately contribute to temporal changes in  
541 microbial diversity. *mBio* **5**, 1-9 (2014).

542 49 Holyoak, M. & Loreau, M. Reconciling empirical ecology with neutral community models.  
543 *Ecology* **87**, 1370-1377 (2006).

544 50 Wagner, M. *et al.* Microbial community composition and function in wastewater treatment  
545 plants. *Antonie Van Leeuwenhoek International Journal of General and Molecular*  
546 *Microbiology* **81**, 665-680 (2002).

547 51 Santillan, E., Phua, W. X., Constancias, F. & Wuertz, S. Sustained organic loading  
548 disturbance favors nitrite accumulation in bioreactors with variable resistance, recovery and  
549 resilience of nitrification and nitrifiers. *Sci. Rep.* **10**, 21388 (2020).

550 52 Shade, A. Diversity is the question, not the answer. *ISME J.* **11**, 1-6 (2017).

551 53 Graham, E. B. *et al.* Toward a generalizable framework of disturbance ecology through  
552 crowdsourced science. *Frontiers in Ecology and Evolution* **9** (2021).

553 54 Savage, M., Sawhill, B. & Askenazi, M. Community Dynamics: What Happens When We  
554 Rerun the Tape? *J. Theor. Biol.* **205**, 515-526 (2000).

555 55 Allen, C. R. & Holling, C. Novelty, adaptive capacity, and resilience. *Ecol. Soc.* **15** (2010).

556 56 Rice, E. W., Baird, R. B. & Eaton, A. D. *Standard Methods for the Examination of Water and*  
557 *Wastewater*. 23 edn, (APHA-AWWA-WEF, 2017).

558 57 Tchobanoglous, G., Stensel, H. D., Tsuchihashi, R. & Burton, F. L. *Wastewater engineering:*  
559 *treatment and resource recovery*. 5th edn, (McGraw Hill Education 2013).

560 58 Thijs, S. *et al.* Comparative evaluation of four bacteria-specific primer pairs for 16S rRNA  
561 gene surveys. *Front. Microbiol.* **8**, 1-15 (2017).

562 59 Glöckner, F. O. *et al.* 25 years of serving the community with ribosomal RNA gene reference  
563 databases and tools. *J. Biotechnol.* **261**, 169-176 (2017).

564 60 Clarke, K. R. & Gorley, R. N. *PRIMER v7: User Manual/Tutorial*. (PRIMER-E, 2015).

565 61 McMurdie, P. J. & Holmes, S. phyloseq: an R package for reproducible interactive analysis  
566 and graphics of microbiome census data. *PLoS One* **8**, e61217 (2013).

567 62 Wickham, H. *ggplot2: elegant graphics for data analysis*. 2nd edn, (Springer-Verlag, 2016).

568 63 Kassambara, A. rstatix: pipe-friendly framework for basic statistical tests. *R-package (v.0.6.0)*  
569 (2020).

570 64 Kassambara, A. ggpubr: “ggplot2” based publication ready plots. *R-package (v.0.1.6)* (2017).

571 65 Albertsen, M., Karst, S. M., Ziegler, A. S., Kirkegaard, R. H. & Nielsen, P. H. Back to basics  
572 - the influence of DNA extraction and primer choice on phylogenetic analysis of activated  
573 sludge communities. *PLoS One* **10**, 15 (2015).

574 66 Wright, E. S. Using decipher v2.0 to analyze big biological sequence data in R. *R Journal* **8**,  
575 352-359 (2016).

576 67 Schliep, K. P. phangorn: phylogenetic analysis in R. *Bioinformatics* **27**, 592-593 (2010).

577 68 Mikryukov, V. metagMisc: Miscellaneous functions for metagenomic analysis. *R-package*  
578 *(v.0.0.4)* (2020).

579 69 Kembel, S. W. *et al.* Picante: R tools for integrating phylogenies and ecology. *Bioinformatics*  
580 **26**, 1463-1464 (2010).

581 70 Oksanen, F. J. *et al.* vegan: community ecology package. *R-package (v.2.5.6)* (2019).

582  
583

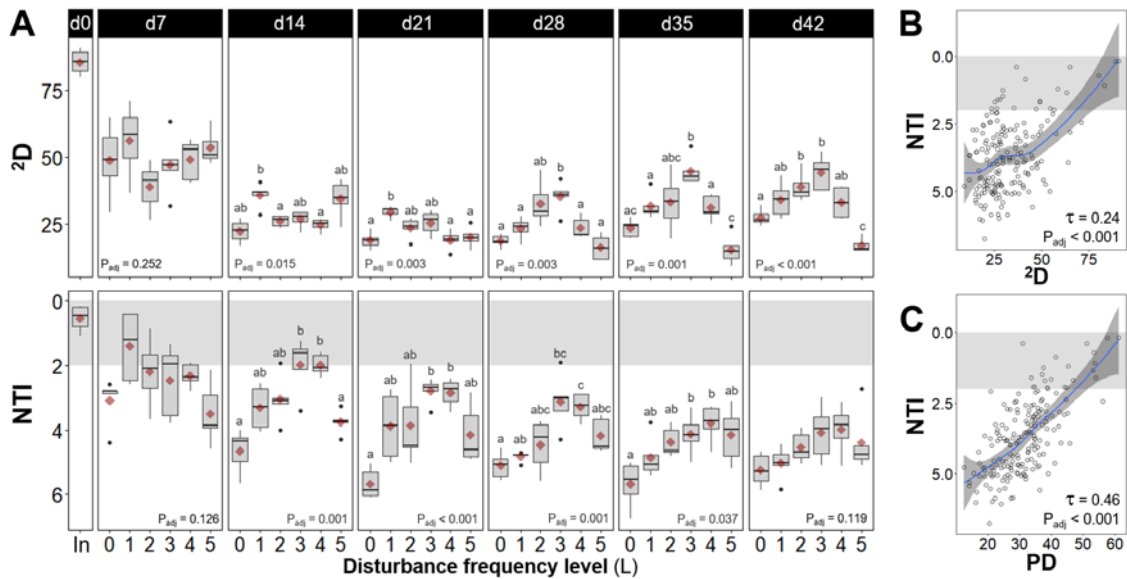

584

585 **Fig. 1** – Community dynamics in  $\alpha$ -diversity. (A) Community structure assessed via 2<sup>nd</sup> order true  $\alpha$ -  
 586 diversity ( ${}^2D$ , upper panels) and community assembly evaluated via the nearest taxon index (NTI,  
 587 lower panels), from bacterial ASV data for different frequencies of organic loading disturbance ( $n =$   
 588 5). Disturbance frequency levels (L): 0 (undisturbed), 1-4 (intermediately disturbed), 5 (press-  
 589 disturbed). In: sludge inoculum (day 0,  $n = 4$ ). Each panel represents a sampling day, red diamonds  
 590 display mean values. Characters above boxes display Games-Howell post-hoc grouping ( $P_{adj} < 0.05$ ).  
 591 Welch's ANOVA  $P$ -values adjusted at 5% FDR shown within panels. Correlations of (B)  ${}^2D$  and (C)  
 592 phylogenetic diversity (PD) versus NTI from bacterial ASV data across all frequency levels and time  
 593 points evaluated in this study ( $m = 184$ ). Kendall correlation  $\tau$ - and adjusted  $P$ -values are indicated  
 594 within the panel. Blue line represents locally estimated scatterplot smoothing regression (loess) with  
 595 confidence interval in dark-grey shading. Note the inverted y-axis for NTI, as values closer to zero  
 596 indicate a higher relative contribution of stochastic assembly. Shaded in grey is the zone of significant  
 597 stochastic phylogenetic dispersion,  $|NTI| < 2$ .

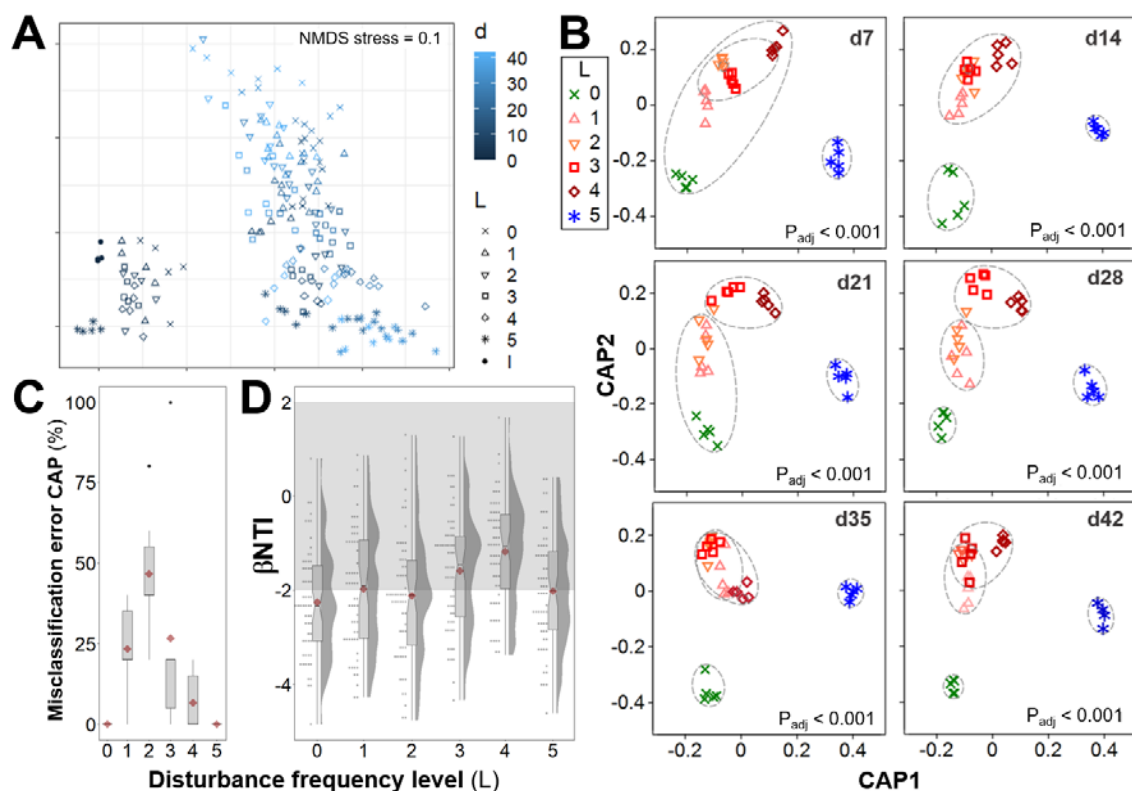

598

599 **Fig. 2** – Temporal dynamics of  $\beta$ -diversity community structure and assembly for bacterial ASV data  
600 across different frequencies of organic loading disturbance ( $n = 5$  bioreactors). **(A)** Unconstrained  
601 NMDS ordination (weighed Unifrac  $\beta$ -diversity, Hellinger transformed data) for all 184 samples  
602 collected. Disturbance frequency levels (L): 0 (undisturbed), 1-4 (intermediately disturbed), 5 (press-  
603 disturbed). I: Sludge inoculum (day 0,  $n = 4$ ). **(B)** Constrained canonical analysis of principal  
604 coordinates (CAP) ordinations (Bray-Curtis  $\beta$ -diversity, squared root transformed data) on different  
605 sampling days, including ellipses of 60% group-average cluster similarity and PERMANOVA  
606 adjusted P-values. **(C)** Misclassification errors at each disturbance frequency level, via the leave-one-  
607 out allocation of observations to groups from CAP at each time point after d0 ( $n = 6$  sampling days).  
608 Bray-Curtis  $\beta$ -diversity, squared root transformed data. Red diamonds display mean values. **(D)** Beta  
609 nearest taxon index ( $\beta$ NTI) at each disturbance frequency level, from pairwise comparisons across  
610 within-treatment replicates at each time point after d0 ( $n = 60$  comparisons). Red diamonds display  
611 mean values. Notches show the 95% confidence interval for the median. When notches do not  
612 overlap, the medians can be judged to differ significantly. Shaded in grey is the zone where stochastic  
613 processes significantly dominate,  $|\beta$ NTI| < 2.  $\beta$ NTI values closer to zero indicate a higher relative  
614 contribution of stochastic assembly.

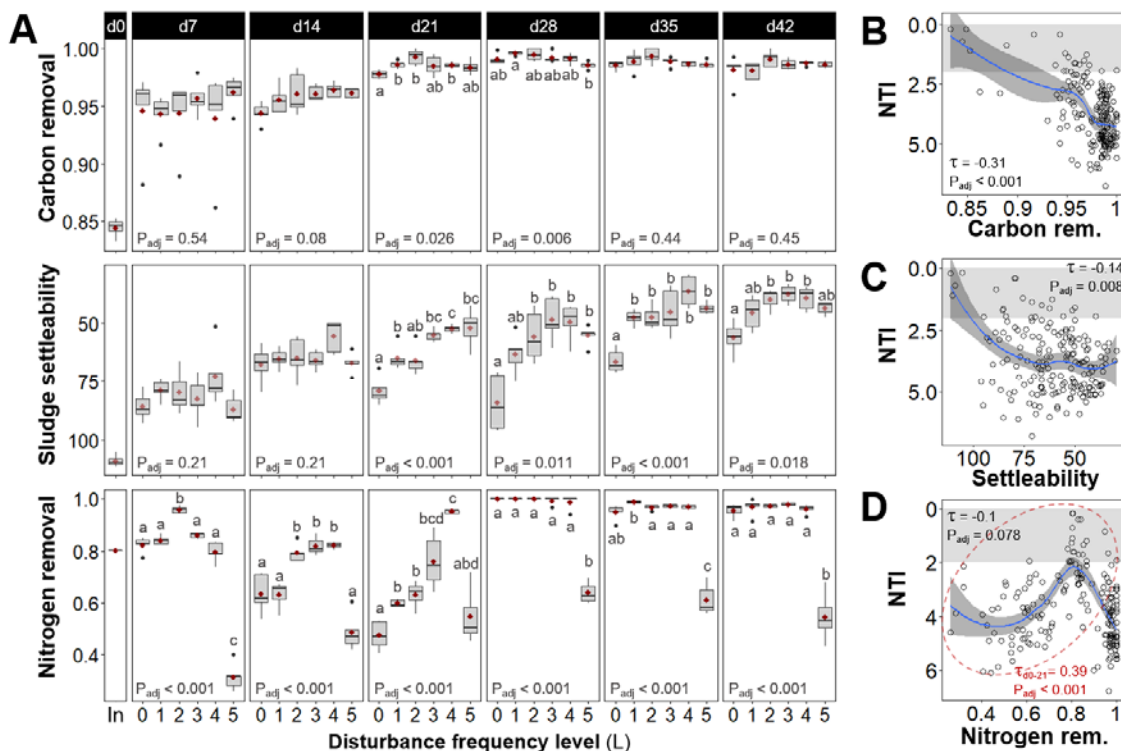

615

616 **Fig. 3** – Community function assessed via influent chemical oxygen demand removal (carbon  
617 removal, upper panels), sludge volume index (sludge settleability, middle panels), and influent total  
618 Kjeldahl nitrogen removal (nitrogen removal, lower panels) for different frequencies of organic  
619 loading disturbance ( $n = 5$ ). Disturbance frequency levels (L): 0 (undisturbed), 1-4 (intermediately  
620 disturbed), 5 (press-disturbed). In: sludge inoculum (day 0,  $n = 4$ ). Each panel represents a sampling  
621 day, red diamonds display mean values. Characters above boxes display Games-Howell post-hoc  
622 grouping ( $P_{adj} < 0.05$ ). Welch's ANOVA P-values adjusted at 5% FDR shown within panels.  
623 Correlations of **(B)** carbon removal, **(C)** sludge settleability, and **(D)** nitrogen removal, versus NTI  
624 from bacterial ASV data across all frequency levels and time points evaluated in this study ( $m = 184$ ).  
625 Kendall correlation  $\tau$ - and adjusted P-values are indicated within the panels. Blue line represents  
626 locally estimated scatterplot smoothing regression (loess) with confidence interval in dark-grey  
627 shading. Shaded in grey is the zone of significant stochastic phylogenetic dispersion,  $|NTI| < 2$ . Red  
628 ellipse and  $\tau$ - and P-value in panel **(D)** indicate data at initial stages of succession (d0 to d21). Note  
629 the inverted axis for sludge settleability, as it increases with decreasing SVI values, and for NTI, since  
630 values closer to zero indicate a higher relative contribution of stochastic assembly.

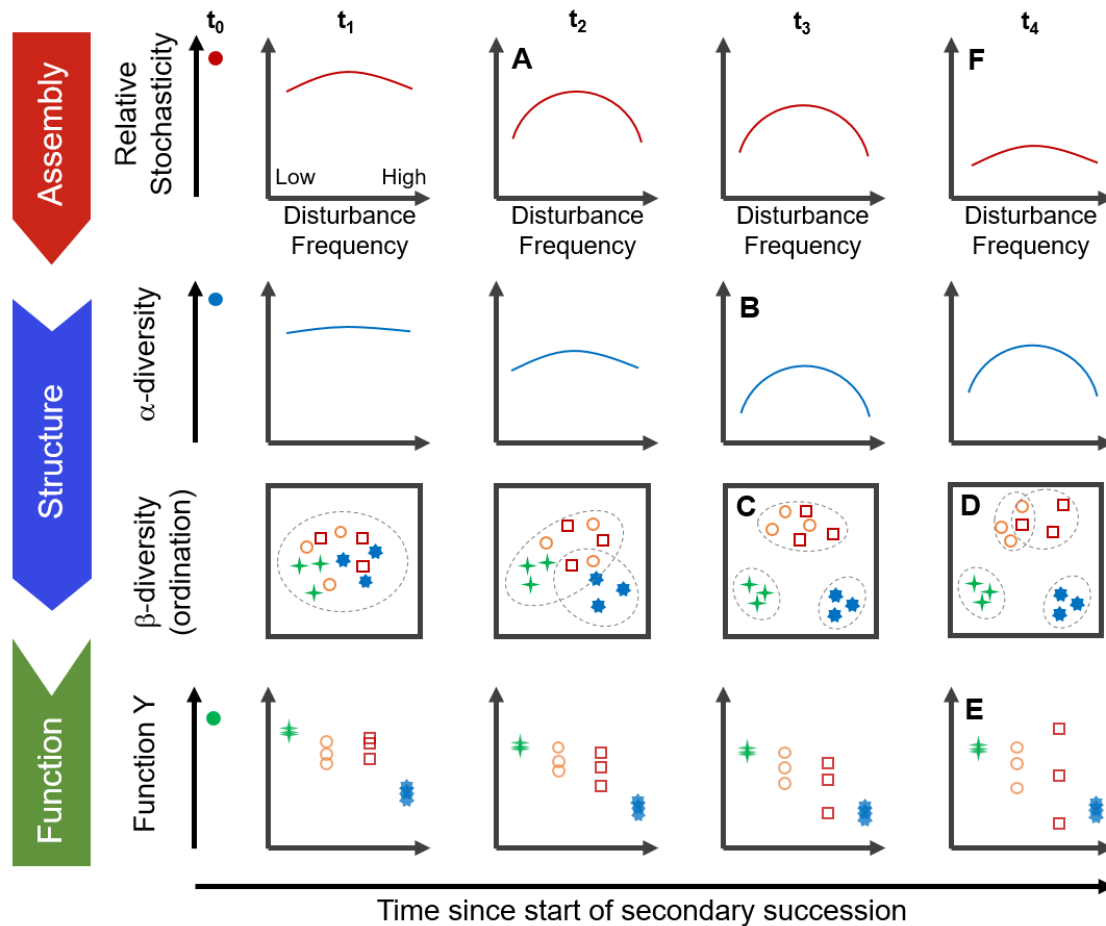

631

632 **Fig. 4** - Conceptual representation of the intermediate stochasticity hypothesis (ISH) to describe  
 633 patterns of assembly and structure along a disturbance frequency gradient, for communities in  
 634 secondary succession (starting at time point  $t_0$ ). (A) Initially, stochastic assembly mechanisms (*e.g.*,  
 635 priority effects, historical contingency and legacy effects) are favored at intermediate disturbance  
 636 frequencies, promoting re-colonization processes from the low-abundance fraction of the community  
 637 or seed-bank. (B) Subsequently, these are followed by changes in the community structure that  
 638 manifest as a peak of  $\alpha$ -diversity at intermediate levels of disturbance. (C) At least three separated  
 639 clusters of  $\beta$ -diversity ordination would form over time across the disturbance range. However,  
 640 stochasticity operating at intermediate disturbance levels may lead to variable within treatment (D)  $\beta$ -  
 641 diversity and (E) community function. (F) The overall relative contribution of stochasticity decreases  
 642 with succession time. The observed patterns of diversity are stronger in terms of relative abundances  
 643 than richness, as well as at the phylogenetic versus the taxonomic level.
